# Supplementary material for: Defining Effective Combinations of Immune Checkpoint Blockade and Oncolytic Virotherapy
Source: Oxford University Press journal article supplement (doi:10.1158/1078-0432.ccr-14-2009), 2015-07-17
Supplement: 10780432ccr142009-sup-135837_6_supp_3039798_nqq2yj.docx [file 10780432ccr142009-sup-135837_6_supp_3039798_nqq2yj.docx]

**
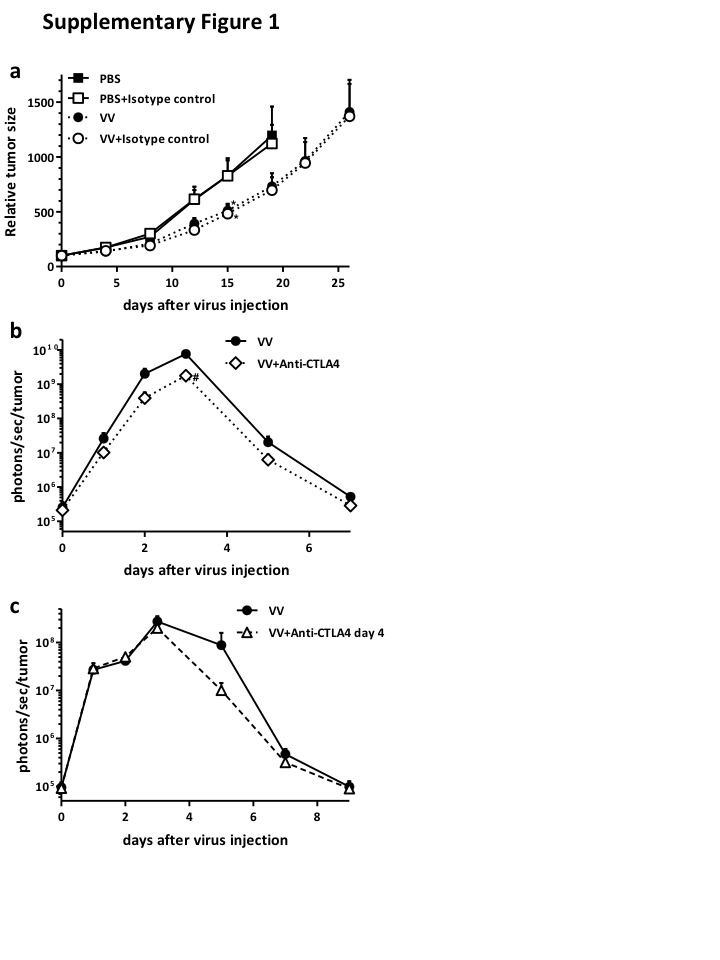
**

**Supplementary Figure 1**. **(a)** Isotype control antibody does not affect anti-tumor activity. Balb/C mice carrying Renca tumors were treated with PBS or 2x108 plaque-forming units (pfu) per mouse of oncolytic Vaccinia Virus. At days 4, 7, and 10 after virus injection, PBS or a dose of 100 μg of isotype control antibody was injected i.p. Tumor growth was measured and relative tumor volume +SE of the 9-10 mice/group is depicted. **(b)** Anti-CTLA4 antibody administration also reduces Vaccinia Virus replication in MC38 xenografts. C57/BL6 mice harboring subcutaneous MC38 tumors (mouse colon adenocarcinoma) were injected with an intravenous dose of 2x108 plaque-forming units (pfu) per mouse of oncolytic Vaccinia Virus. For the combination group, a dose of 100 μg of mouse anti-CTLA4 antibody was injected intraperitoneally at days 0, 3 and 6 post-virus injection. Viral gene expression from within the tumor was quantified by bioluminescence imaging of viral luciferase expression. Mean values of 9-10 animals +SD are plotted. **(c)** Bioluminescence imaging of viral gene expression after novel Vaccinia+anti-CTLA4 administration schedule. Balb/c mice bearing Renca tumors were injected intravenously with 2x108 plaque-forming units (pfu) per mouse of oncolytic Vaccinia Virus. For the combination group, 100 μg of mouse anti-CTLA4 antibody was injected intraperitoneally at days 4, 7 and 10 after virus administration. Reduction in luciferase expression was not significant compared with Vaccinia group. Mean values of 8-10 animals +SD are plotted. (* P<0.05 compared with PBS group; # P<0.05 compared with VV group).

**
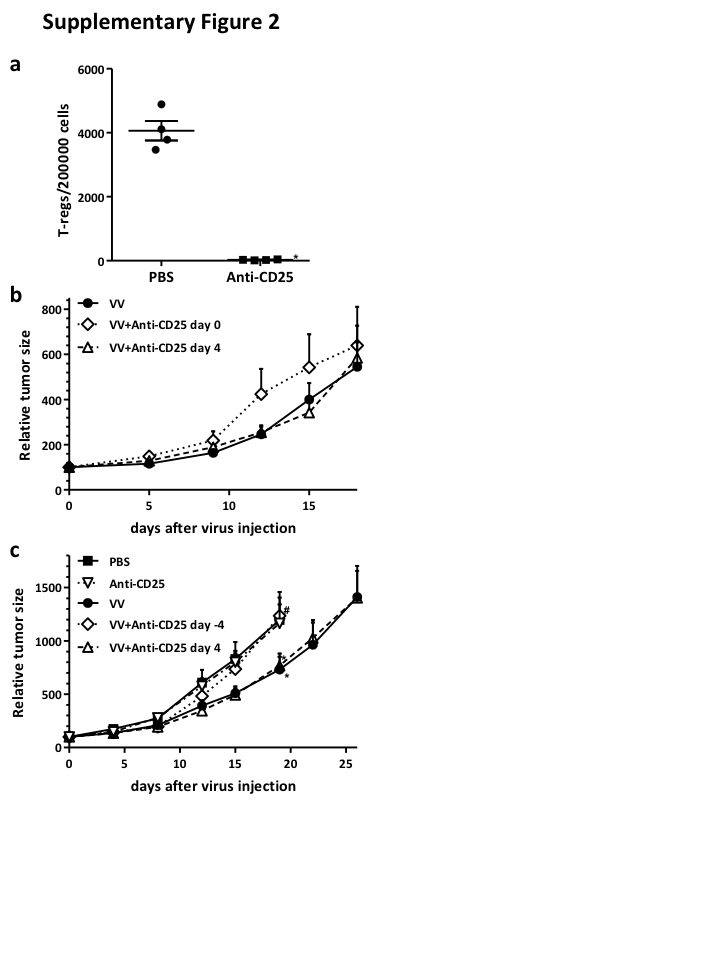
**

**Supplementary Figure 2**. **(a)** Depletion of T-regs by anti-CD25 administration. Splenocytes were isolated from Balb/C mice treated with PBS or 3 doses of 200 μg of mouse anti-CD25 antibody injected 7, 4, and 1 days before spleen harvesting. Number of CD3+ CD4+ CD25+ FoxP3+ cells per 200000 splenocytes was analyzed. Values for individual mice and means +SEM are plotted **(b-c)** Antitumor effects of Vaccinia Virus with anti-CD25 antibody combination therapy using different schedules. Mice (Balb/c with Renca tumors) were injected intravenously with a dose of 2x108 pfu of oncolytic Vaccinia virus (n=7-8 per group). For Vaccinia Virus/ anti-CD25 combination groups, 3 doses of 200 μg of mouse anti-CD25 antibody was injected i.p. every 3 days, beginning at days -4, 0, or 4 after virus injection. Tumor growth was followed by caliper measurements. Means +SE are plotted. (* P<0.05 compared with PBS group; # P<0.05 compared with VV group).


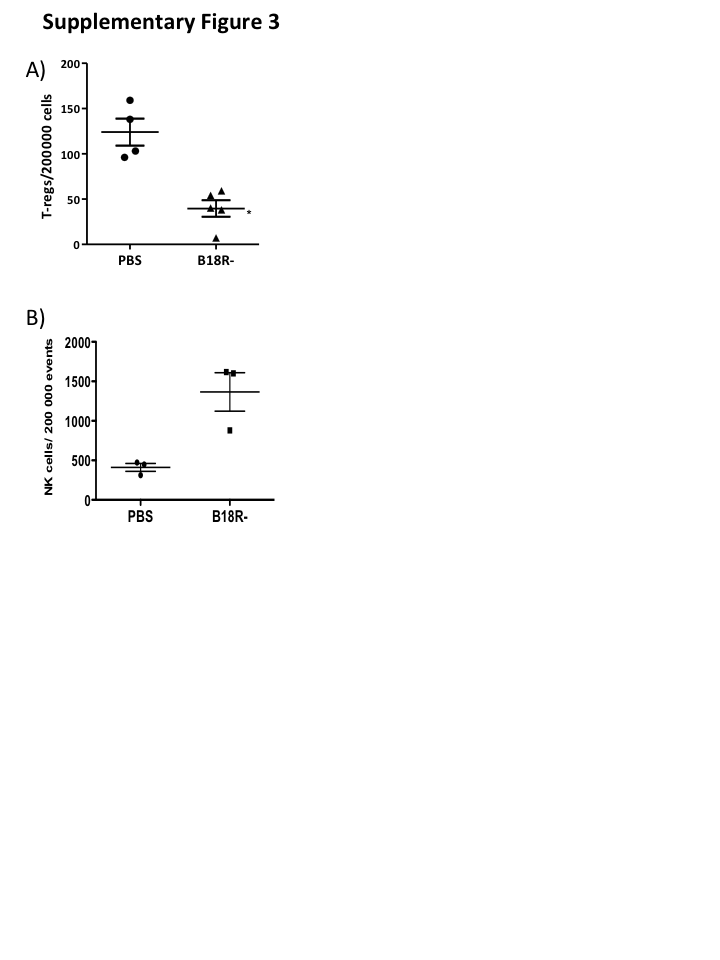


**Supplementary Figure 3 (A)** Reduced number of T-regs after Vaccinia Virus administration. Balb/c mice harboring Renca tumors were treated as indicated. Tumors were harvested at day 11 post-virus injection and evaluated for T-regs by flow cytometry. Number of CD3+ CD4+ CD25+ FoxP3+ cells per 200000 total cells are plotted (individual tumors and means +SEM) **(B)** Increased NK cell infiltration into sites of infection 48h after viral delivery. Mice received 1e6 PFU of virus IP and peritoneal lavage was performed after 48h. Number of NK1.1+NKp46+CD3- cells per 200 000 events are shown. (* P<0.05 compared with PBS group).


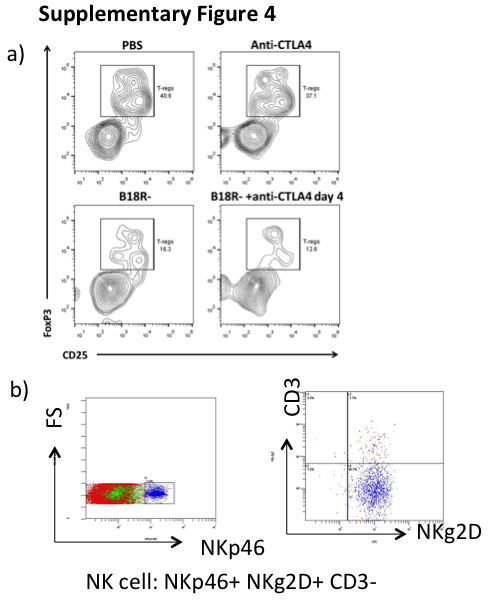


**Supplementary Figure 4.** Examples of flow cytometry gating and patterns **(a)** Percentage of regulatory T-cells within the CD3+CD4+ population.Flow cytometry of one representative tumor from each group are also depicted **(b)** Gating used to define NK cells within the tumor population (NKp46+NKg2D+CD3-).


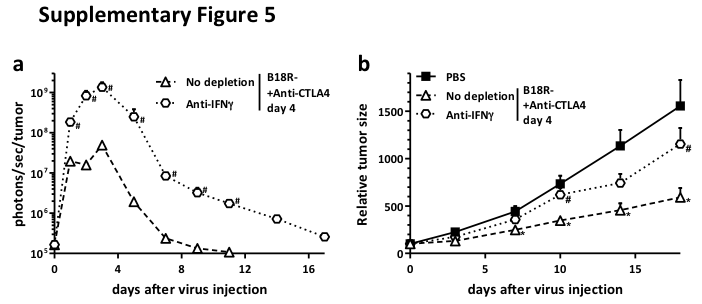


**Supplementary Figure 5.** Effect of depleting interferon γ on virus replication and antitumor activity. Balb/C mice injected with IFNγ depleting antibody were challenged with Renca tumors and treated as indicated. Luciferase expression from within the tumor **(a)** and tumor growth **(b)** were monitored (+SE, 12-15 mice/group) (*P<0.05 compared with PBS group; # P<0.05 compared with No depletion group).
